# Supplementary material for: Improving the performance of Li–S batteries by reinforced PPy wrapping over acetylene black-coated sulfur
Source: Royal Society of Chemistry journal article supplement (doi:10.1039/c4ra15796f), 2015-01-01
Supplement: c4ra15796f1.pdf [file c4ra15796f1.pdf]

## Electronic Supplementary Information

### Improving the performance of Li–S Batteries by reinforced PPy wrapping over acetylene black-coated sulfur

Wei Qin<sup>a,\*</sup>, Baodong Fang<sup>b</sup>, Songtao Lu<sup>c</sup>, Zhida Wang<sup>c</sup>, Yan Chen<sup>c</sup>, Xiaohong Wu<sup>c,\*</sup> and Lu Han<sup>c</sup>

<sup>a</sup> School of Materials Science and Engineering, Harbin Institute of Technology, Harbin, 150001, PR China

<sup>b</sup> Shanghai Institute of Satellite Engineer, Shanghai, 200240, PR China

<sup>c</sup> Department of Chemistry, Harbin Institute of Technology, Harbin, 150001, PR China

#### 1. Experimental

##### 1.1 Coating of AB on sulfur

Prior the synthesis of AB/S composite, 200 mg of AB were sonicated in 5 ml ethyl alcohol for 30 mins to form a stable suspension. Uniform coating of AB on sulfur was realized by a simple chemical deposit method. Briefly, 2.5 g of Na<sub>2</sub>S<sub>2</sub>O<sub>3</sub> was first dispersed in 750 ml of nanopure water, then the as-prepared AB suspension was added to the Na<sub>2</sub>S<sub>2</sub>O<sub>3</sub> solution with magnetic stirring. The mixed solution was then stirred at room temperature for 6 hours to ensure good dispersion. Afterwards, 50 ml of HCl (0.5 M) was slowly added at the rate of 0.1 ml min<sup>-1</sup>. The as-synthesized AB/S was collected by vacuum filtration and washed with nanopure water several times in order to remove residue salts and impurities. Finally, the collected samples were dried at 70°C for at least 72 hours.

##### 1.2 Wrapping of PPy on AB/S

The as-prepared AB/S composites was dispersed in 200 ml of HCl (0.5mol/L) solution, While under vigorous stirring, 55.3 mg cetyltrimethyl ammonium bromide (CTAB) and 91 μl pyrrole (1.31 mmol) was added, followed by an addition of ammonium peroxydisulfate (3:1 equiv mole of pyrrole). The reaction temperature was controlled with 0-5 ° C using an ice bath and the reaction time was 4h. The as-synthesized PPy-AB/S was collected by vacuum filtration and washed with nanopure water several times in order to remove residue salts and impurities. Finally, the collected samples were dried at 70°C for at least 72 hours.

##### 1.3 Characterization

Scanning electron microscopy (SEM) images were collected using a field emission scanning electron microscope (FESEM, JSM-6700). Transmission electron microscopy (TEM) images and energy-dispersive spectroscopy (EDS) were obtained by using a Hitachi-7650. The weight percentage of sulfur in the composite was determined by thermogravimetric analysis (TGA) using a DSC 141 Simultaneous DSC-TGA instrument (TA Instruments). Electrochemical measurements were carried out using PRINCETON 4000 and Land battery analyzers.

##### 1.4 Preparation of Cathode and Electrochemical Evaluation

To prepare the working electrode, PPy-AB/S composite was mixed with PVDF binder in NMP to form slurry with a weight ratio of 9:1. The slurry was then coated onto aluminium foil using doctor blade method and dried to form the working electrode. The

total material loading density was 1.3~1.8 mg cm<sup>-2</sup>. 2032 type coin cells were assembled in an argon-filled glove box with lithium foil as the anode. The separator was purchased from Cellgard (model 2400). The electrolyte was 0.1 M lithium nitrate and 1.0 M lithium bis-trifluoromethane sulfonylimide in 1,3-dioxolane and 1,2-dimethoxyethane (volume ratio 1:1) Galvanostatic measurements were conducted between 1.5 V and 3.0 V (vs Li<sup>+</sup>/Li). Specific capacity values were calculated based on the mass of S in the samples.

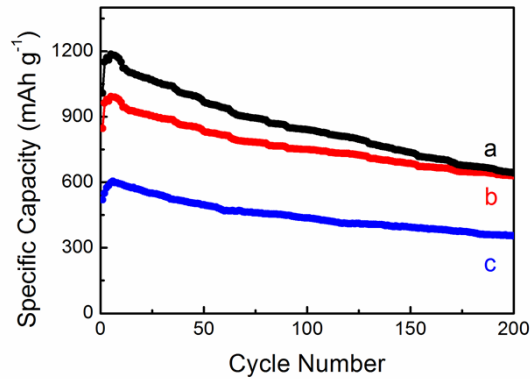

Fig. S1 Comparison of specific capacity as a function of cycle numbers for electrodes assembled with PPy-AB/S composites with various contents of sulfur (a. 33%, b. 45% and c.63%).

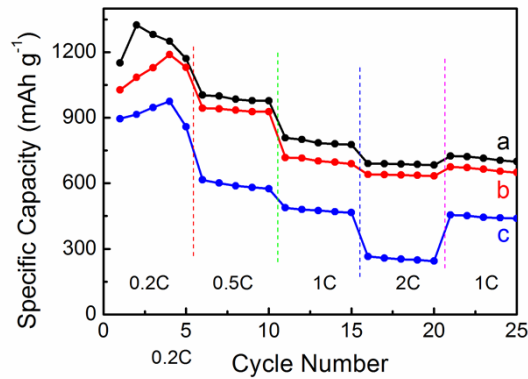

Fig. S2 Comparison of the capacity vs the current density (0.2C, 0.5C, 1C, and 2C) of the the cathodes assembled with PPy-AB/S composites with various contents of sulfur (a. 33%, b. 45% and c.63%).
